# Supplementary material
Source: ML conference proceedings conference paper supplement (https://proceedings.mlr.press/v37/rezende15.html)
Supplement: Supplementary file [file rezende15-supp.pdf]

---

## Appendix: Variational Inference with Normalizing Flows

---

**Danilo Jimenez Rezende**  
**Shakir Mohamed**  
 Google DeepMind, London

DANILOR@GOOGLE.COM  
 SHAKIR@GOOGLE.COM

### A. Invertibility conditions

We describe the constraints required to have invertible maps for the planar and radial normalizing flows described in section 3.

#### A.1. Planar flows

Functions of the form (10) are not always invertible depending on the non-linearity and parameters chosen. When using  $h(x) = \tanh(x)$ , a sufficient condition for  $f(\mathbf{z})$  to be invertible is that  $\mathbf{w}^\top \mathbf{u} \geq -1$ .

This can be seen by splitting  $\mathbf{z}$  as a sum of a vector  $\mathbf{z}_\perp$  perpendicular to  $\mathbf{w}$  and a vector  $\mathbf{z}_\parallel$ , parallel to  $\mathbf{w}$ . Substituting  $\mathbf{z} = \mathbf{z}_\perp + \mathbf{z}_\parallel$  into (10) gives

$$f(\mathbf{z}) = \mathbf{z}_\perp + \mathbf{z}_\parallel + \mathbf{u}h(\mathbf{w}^\top \mathbf{z}_\parallel + b). \quad (1)$$

This equation can be solved for  $\mathbf{z}_\perp$  given  $\mathbf{z}_\parallel$  and  $\mathbf{y} = f(\mathbf{z})$ , having a unique solution

$$\mathbf{z}_\perp = \mathbf{y} - \mathbf{z}_\parallel - \mathbf{u}h(\mathbf{w}^\top \mathbf{z}_\parallel + b). \quad (2)$$

The parallel component can be further expanded as  $\mathbf{z}_\parallel = \alpha \frac{\mathbf{w}}{\|\mathbf{w}\|^2}$ , where  $\alpha \in \mathbb{R}$ . The equation that must be solved for  $\alpha$  is derived by taking the dot product of (1) with  $\mathbf{w}$ , yielding the scalar equation

$$\mathbf{w}^\top f(\mathbf{z}) = \alpha + \mathbf{w}^\top \mathbf{u}h(\alpha + b). \quad (3)$$

A sufficient condition for (3) to be invertible w.r.t  $\alpha$  is that its r.h.s  $\alpha + \mathbf{w}^\top \mathbf{u}h(\alpha + b)$  to be a non-decreasing function. This corresponds to the condition  $1 + \mathbf{w}^\top \mathbf{u}h'(\alpha + b) \geq 0 \equiv \mathbf{w}^\top \mathbf{u} \geq -\frac{1}{h'(\alpha + b)}$ . Since  $0 \leq h'(\alpha + b) \leq 1$ , it suffices to have  $\mathbf{w}^\top \mathbf{u} \geq -1$ .

We enforce this constraint by taking an arbitrary vector  $\mathbf{u}$  and modifying its component parallel to  $\mathbf{w}$ , producing a new vector  $\hat{\mathbf{u}}$  such that  $\mathbf{w}^\top \hat{\mathbf{u}} > -1$ . The modified vector can be compactly written as  $\hat{\mathbf{u}}(\mathbf{w}, \mathbf{u}) = \mathbf{u} + [m(\mathbf{w}^\top \mathbf{u}) - (\mathbf{w}^\top \mathbf{u})] \frac{\mathbf{w}}{\|\mathbf{w}\|^2}$ , where the scalar function  $m(x)$  is given by  $m(x) = -1 + \log(1 + e^x)$ .

#### A.2. Radial flows

Functions of the form (14) are not always invertible depending on the values of  $\alpha$  and  $\beta$ . This can be seen by

splitting the vector  $\mathbf{z}$  as  $\mathbf{z} = \mathbf{z}_0 + r\hat{\mathbf{z}}$ , where  $r = |\mathbf{z} - \mathbf{z}_0|$ . Replacing this into (14) gives

$$f(\mathbf{z}) = \mathbf{z}_0 + r\hat{\mathbf{z}} + \beta \frac{r\hat{\mathbf{z}}}{\alpha + r}. \quad (4)$$

This equation can be uniquely solved for  $\hat{\mathbf{z}}$  given  $r$  and  $\mathbf{y} = f(\mathbf{z})$ ,

$$\hat{\mathbf{z}} = \frac{\mathbf{y} - \mathbf{z}_0}{r \left(1 + \frac{\beta}{\alpha + r}\right)}. \quad (5)$$

To obtain a scalar equation for the norm  $r$ , we can subtract both sides of (4) and take the norm of both sides. This gives

$$|y - \mathbf{z}_0| = r \left(1 + \frac{\beta}{\alpha + r}\right). \quad (6)$$

A sufficient condition for (6) to be invertible is for its r.h.s.  $r \left(1 + \frac{\beta}{\alpha + r}\right)$  to be a non-decreasing function, which implies  $\beta \geq -\frac{(r+\alpha)^2}{\alpha}$ . Since  $r \geq 0$ , it suffices to impose  $\beta \geq -\alpha$ . This constraint is imposed by reparametrizing  $\beta$  as  $\tilde{\beta} = -\alpha + m(\beta)$ , where  $m(x) = -1 + \log(1 + e^x)$ .
